# Supplementary material for: TLR Agonists Modify NK Cell Activation and Increase Its Cytotoxicity in Acute Lymphoblastic Leukemia
Source: Preprints.org preprint supplement (doi:10.20944/preprints202404.1527.v1), 2024-04-23
Supplement: Supplementary file 1 [file supplementary]

## Supplementary Material

### 1. Supplementary Figures

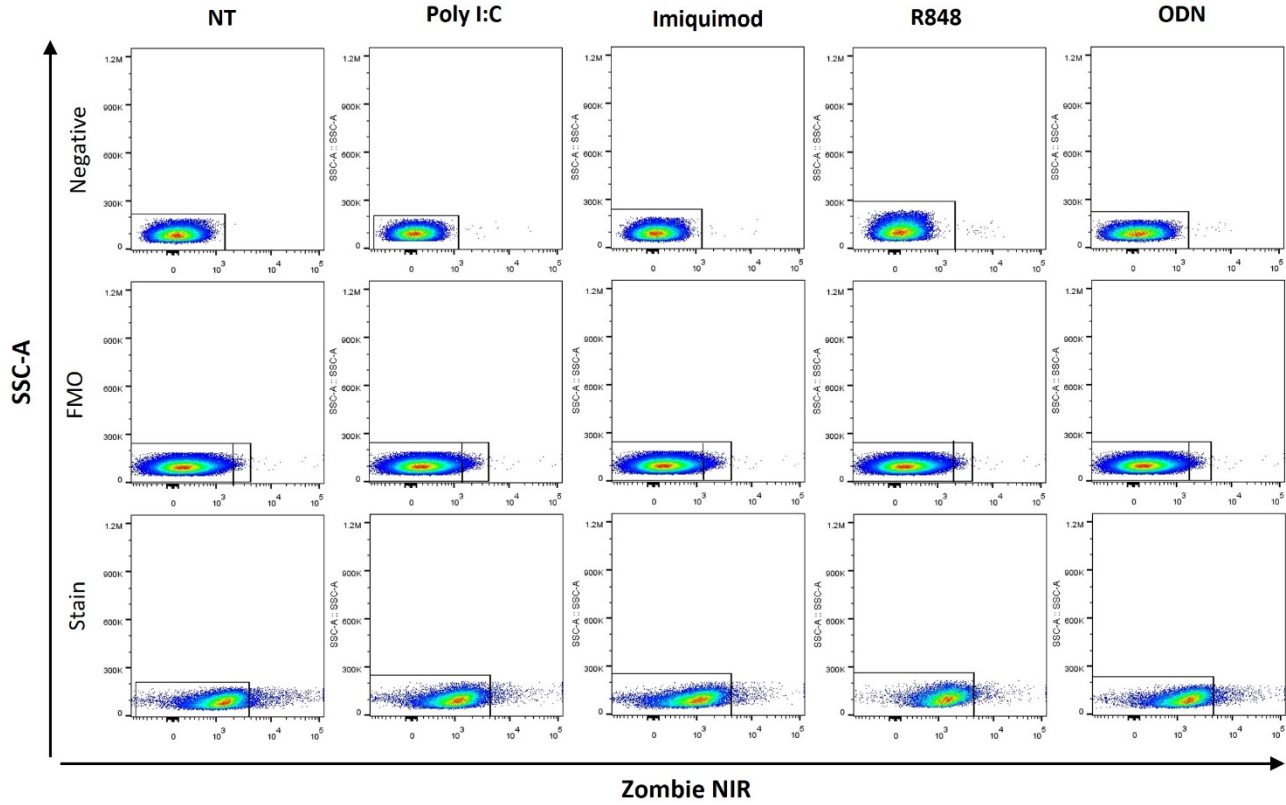

**Figure S1. Viability Cytometry.** For each sample analyzed through cytometry, the inclusion of a viability marker (Zombie NIR-APCCy7) was integral. This marker served the dual purpose of assessing cell viability at the time of acquisition and 24 hours post-treatment. Additionally, its incorporation was essential to prevent contamination in each gate, mitigating the risk of non-specific antibody binding to deceased cells.

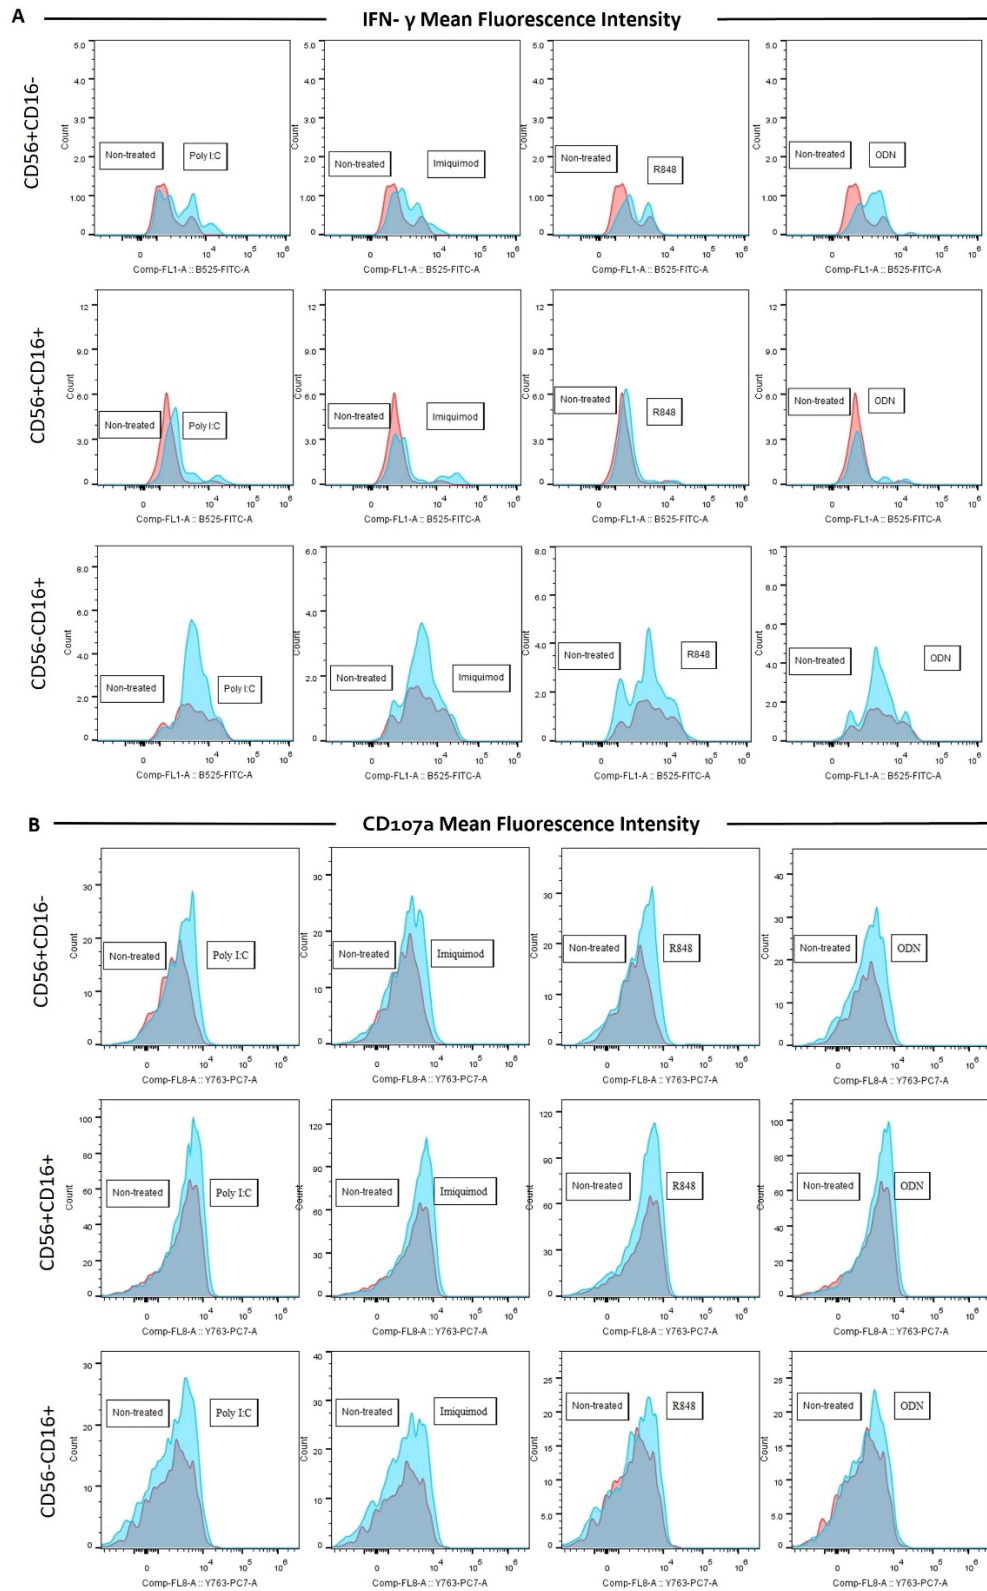

**Figure S2. MFI of Activation markers of the NK cells within PBMCs after endosomal TLR stimulation.** Mean Fluorescence Intensity of IFN- $\gamma$  and CD107a expressed in the different NK subpopulations after each treatment vs non-treated cells.
